# Supplementary material for: Urban Congestion Scaling Discrepancy Worldwide: cities metabolate transportation inefficiency by a ¾ power law
Source: Research Square preprint supplement (doi:10.21203/rs.3.rs-8204378/v1), 2025-12-09
Supplement: Supplementary file 1 [file 0d9c44c1dae259fe9cf2bedc.docx]

***Fig S1: Hourly vehicle congestion changes across continents in 2025 Q1-Q2***


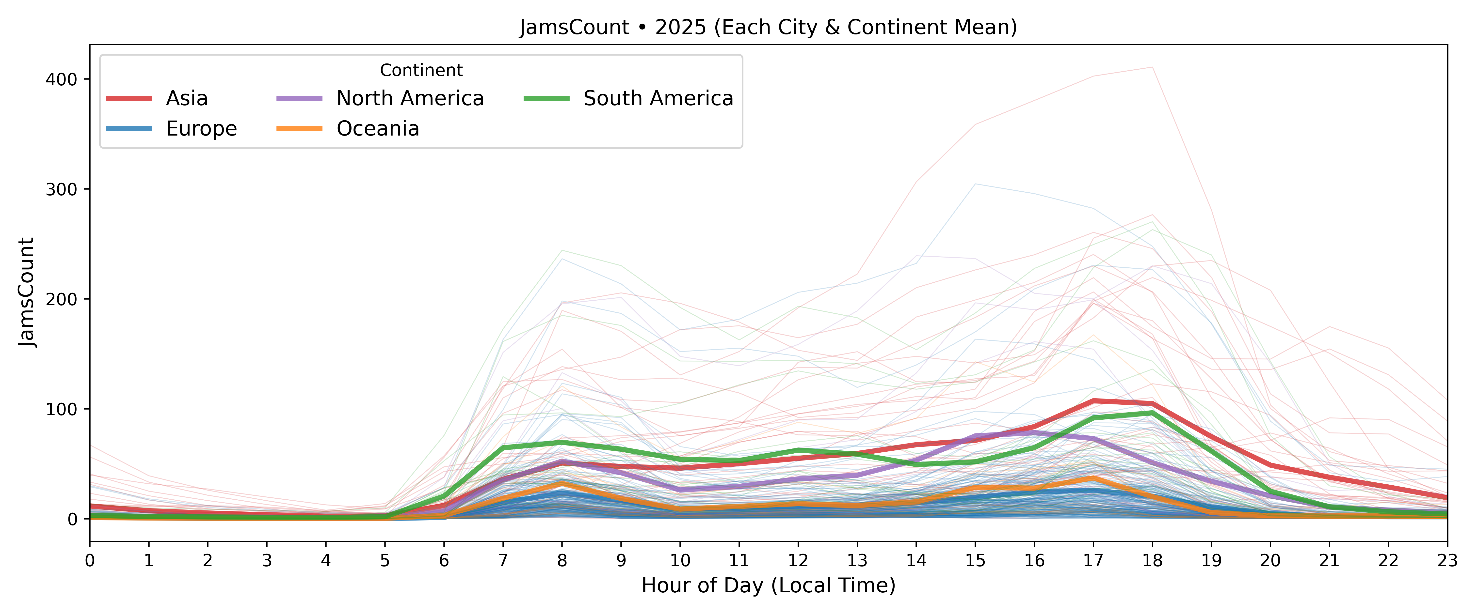


Fig. S1 illustrates the average hourly number of traffic jams across cities, and the evening rush hour is noticeably more congested than the morning rush hour. Also, the bold colored lines representing continent-level averages. A distinct bimodal diurnal pattern is evident, with a morning rush (06:00–10:00) and an evening rush (17:00–20:00), aligning with recent GPS-based reassessments of rush-hour periods1. Because 06:00–07:00 is commonly treated as an urban “wake-up” period1–3, we omit this hour from the morning-rush window in subsequent analyses.

***Table S1: Cumulative monthly JTL by Continent in 2025 Q1-Q2***

| Continent | Jan | Feb | Mar | Apr | May | Jun |
| --- | --- | --- | --- | --- | --- | --- |
| Asia | 47621.74 | 102107.7 | 164272.2 | 215886.7 | 267465.7 | 316477.7 |
| Europe | 16923.21 | 36487.27 | 60002.01 | 81314.35 | 105357.5 | 129219.6 |
| North America | 45071.62 | 102946.6 | 158411.1 | 211633.3 | 277141.6 | 338656.3 |
| Oceania | 23714.11 | 63285.82 | 106491.4 | 153738.3 | 200135.1 | 242518.2 |
| South America | 9835.08 | 30834.59 | 52173.38 | 67264.62 | 89042.27 | 104932.6 |

***Table S2: Travel time(mins) for a 10 km trip in 2025 Q1-Q2***

| Continent | Period | Median | Q1 | Q3 | IQR |
| --- | --- | --- | --- | --- | --- |
| Asia | 2025-Q1 | 23.38 | 21.64 | 23.85 | 2.22 |
| Asia | 2025-Q2 | 23.15 | 21.75 | 23.61 | 1.85 |
| Europe | 2025-Q1 | 22.83 | 21.34 | 23.4 | 2.06 |
| Europe | 2025-Q2 | 23.2 | 21.27 | 23.94 | 2.67 |
| North America | 2025-Q1 | 24.97 | 22.37 | 27.13 | 4.76 |
| North America | 2025-Q2 | 25.7 | 22.86 | 27.5 | 4.64 |
| South America | 2025-Q1 | 25.58 | 23.07 | 27.37 | 4.3 |
| South America | 2025-Q2 | 27.06 | 23.31 | 28.32 | 5.01 |
| Oceania | 2025-Q1 | 19.94 | 19.24 | 20.6 | 1.36 |
| Oceania | 2025-Q2 | 20.21 | 19.35 | 20.76 | 1.4 |

***Table S3: Additional travel time(h) caused by urban congestion in 2025 Q1-Q2***

| Continent | Period | Median | Q1 | Q3 | IQR |
| --- | --- | --- | --- | --- | --- |
| Asia | All day | 50.18 | 37.59 | 76.99 | 39.4 |
| Asia | Morning rush | 7.02 | 0.62 | 10.49 | 9.88 |
| Asia | Evening rush | 15.07 | 9.82 | 17.08 | 7.25 |
| Europe | All day | 93.6 | 59.37 | 114.9 | 55.53 |
| Europe | Morning rush | 16.98 | 11.34 | 19.38 | 8.03 |
| Europe | Evening rush | 16.18 | 13.02 | 21.32 | 8.3 |
| North America | All day | 87.99 | 87.99 | 109.06 | 21.07 |
| North America | Morning rush | 19.32 | 19.32 | 19.32 | 0 |
| North America | Evening rush | 18.19 | 18.19 | 22.94 | 4.76 |
| South America | All day | 51.4 | 24.94 | 77.47 | 52.54 |
| South America | Morning rush | 13 | 4.15 | 16.1 | 11.95 |
| South America | Evening rush | 12.4 | 4.24 | 17.32 | 13.08 |
| Oceania | All day | 94.73 | 83.13 | 128.42 | 45.29 |
| Oceania | Morning rush | 18.04 | 17.25 | 25.18 | 7.93 |
| Oceania | Evening rush | 22.41 | 20.42 | 31.05 | 10.63 |

***Table S4: Country-level congestion scaling exponent across different time periods***

| Country | Continent | Period | β (se) | R² | P-value |
| --- | --- | --- | --- | --- | --- |
| Japan | Asia | All-day | 0.68 ± 0.12 | 0.908 | 0.012 |
| Japan | Asia | Non-Peak | 0.72 ± 0.13 | 0.914 | 0.011 |
| Japan | Asia | Morning | 0.60 ± 0.13 | 0.878 | 0.019 |
| Japan | Asia | Evening | 0.67 ± 0.13 | 0.904 | 0.013 |
| Turkey | Asia | All-day | 1.16 ± 0.11 | 0.934 | <0.001 |
| Turkey | Asia | Non-Peak | 1.11 ± 0.11 | 0.922 | <0.001 |
| Turkey | Asia | Morning | 1.32 ± 0.18 | 0.867 | <0.001 |
| Turkey | Asia | Evening | 1.18 ± 0.12 | 0.921 | <0.001 |
| United Arab Emirates | Asia | All-day | 1.84 ± 0.21 | 0.963 | 0.003 |
| United Arab Emirates | Asia | Non-Peak | 1.82 ± 0.21 | 0.962 | 0.003 |
| United Arab Emirates | Asia | Morning | 1.82 ± 0.14 | 0.983 | <0.001 |
| United Arab Emirates | Asia | Evening | 1.87 ± 0.26 | 0.945 | 0.006 |
| Austria | Europe | All-day | 0.56 ± 0.13 | 0.852 | 0.025 |
| Austria | Europe | Non-Peak | 0.54 ± 0.15 | 0.802 | 0.04 |
| Austria | Europe | Morning | 0.54 ± 0.10 | 0.901 | 0.014 |
| Austria | Europe | Evening | 0.64 ± 0.16 | 0.843 | 0.028 |
| Belgium | Europe | All-day | 0.80 ± 0.12 | 0.847 | <0.001 |
| Belgium | Europe | Non-Peak | 0.83 ± 0.11 | 0.885 | <0.001 |
| Belgium | Europe | Morning | 0.67 ± 0.13 | 0.782 | <0.001 |
| Belgium | Europe | Evening | 0.89 ± 0.17 | 0.772 | <0.001 |
| France | Europe | All-day | 0.69 ± 0.09 | 0.718 | <0.001 |
| France | Europe | Non-Peak | 0.75 ± 0.10 | 0.724 | <0.001 |
| France | Europe | Morning | 0.71 ± 0.09 | 0.728 | <0.001 |
| France | Europe | Evening | 0.60 ± 0.09 | 0.641 | <0.001 |
| Germany | Europe | All-day | 0.93 ± 0.08 | 0.838 | <0.001 |
| Germany | Europe | Non-Peak | 0.91 ± 0.09 | 0.821 | <0.001 |
| Germany | Europe | Morning | 0.86 ± 0.09 | 0.788 | <0.001 |
| Germany | Europe | Evening | 1.05 ± 0.11 | 0.799 | <0.001 |
| Italy | Europe | All-day | 0.75 ± 0.12 | 0.615 | <0.001 |
| Italy | Europe | Non-Peak | 0.78 ± 0.15 | 0.555 | <0.001 |
| Italy | Europe | Morning | 0.71 ± 0.13 | 0.555 | <0.001 |
| Italy | Europe | Evening | 0.77 ± 0.13 | 0.604 | <0.001 |
| Netherlands | Europe | All-day | 1.00 ± 0.21 | 0.611 | <0.001 |
| Netherlands | Europe | Non-Peak | 1.06 ± 0.20 | 0.656 | <0.001 |
| Netherlands | Europe | Morning | 0.74 ± 0.22 | 0.435 | 0.004 |
| Netherlands | Europe | Evening | 1.08 ± 0.22 | 0.607 | <0.001 |
| Poland | Europe | All-day | 1.07 ± 0.20 | 0.778 | <0.001 |
| Poland | Europe | Non-Peak | 0.90 ± 0.20 | 0.713 | 0.002 |
| Poland | Europe | Morning | 1.09 ± 0.21 | 0.763 | <0.001 |
| Poland | Europe | Evening | 1.82 ± 0.32 | 0.806 | <0.001 |
| Portugal | Europe | All-day | 0.59 ± 0.08 | 0.954 | 0.004 |
| Portugal | Europe | Non-Peak | 0.78 ± 0.09 | 0.962 | 0.003 |
| Portugal | Europe | Morning | 0.46 ± 0.08 | 0.914 | 0.011 |
| Portugal | Europe | Evening | 0.58 ± 0.09 | 0.932 | 0.008 |
| Spain | Europe | All-day | 0.74 ± 0.14 | 0.537 | <0.001 |
| Spain | Europe | Non-Peak | 0.72 ± 0.15 | 0.495 | <0.001 |
| Spain | Europe | Morning | 0.77 ± 0.15 | 0.549 | <0.001 |
| Spain | Europe | Evening | 0.78 ± 0.15 | 0.539 | <0.001 |
| United Kingdom | Europe | All-day | 1.04 ± 0.20 | 0.567 | <0.001 |
| United Kingdom | Europe | Non-Peak | 1.02 ± 0.18 | 0.616 | <0.001 |
| United Kingdom | Europe | Morning | 1.11 ± 0.34 | 0.332 | 0.004 |
| United Kingdom | Europe | Evening | 1.14 ± 0.23 | 0.547 | <0.001 |
| Canada | North America | All-day | 0.89 ± 0.21 | 0.691 | 0.003 |
| Canada | North America | Non-Peak | 0.88 ± 0.21 | 0.685 | 0.003 |
| Canada | North America | Morning | 0.79 ± 0.24 | 0.58 | 0.01 |
| Canada | North America | Evening | 0.99 ± 0.20 | 0.75 | 0.001 |
| United States of America | North America | All-day | 0.86 ± 0.20 | 0.212 | <0.001 |
| United States of America | North America | Non-Peak | 0.84 ± 0.19 | 0.217 | <0.001 |
| United States of America | North America | Morning | 0.81 ± 0.11 | 0.453 | <0.001 |
| United States of America | North America | Evening | 0.84 ± 0.11 | 0.453 | <0.001 |
| Australia | Oceania | All-day | 0.86 ± 0.12 | 0.874 | <0.001 |
| Australia | Oceania | Non-Peak | 0.83 ± 0.13 | 0.839 | <0.001 |
| Australia | Oceania | Morning | 0.85 ± 0.10 | 0.893 | <0.001 |
| Australia | Oceania | Evening | 0.94 ± 0.14 | 0.856 | <0.001 |
| New Zealand | Oceania | All-day | 0.94 ± 0.20 | 0.881 | 0.018 |
| New Zealand | Oceania | Non-Peak | 0.82 ± 0.17 | 0.88 | 0.018 |
| New Zealand | Oceania | Morning | 1.04 ± 0.20 | 0.899 | 0.014 |
| New Zealand | Oceania | Evening | 1.06 ± 0.26 | 0.846 | 0.027 |
| Brazil | South America | All-day | 1.06 ± 0.22 | 0.772 | 0.002 |
| Brazil | South America | Non-Peak | 1.24 ± 0.23 | 0.8 | 0.001 |
| Brazil | South America | Morning | 0.95 ± 0.26 | 0.653 | 0.008 |
| Brazil | South America | Evening | 0.92 ± 0.24 | 0.685 | 0.006 |

1. Liu, C., Wang, S., Cuomo, S. & Mei, G. Data analysis and mining of traffic features based on taxi GPS trajectories: A case study in Beijing. *Concurr. Comput. Pract. Exp.* **33**, e5332 (2021).

2. Zhang, K., Batterman, S. & Dion, F. Vehicle emissions in congestion: Comparison of work zone, rush hour and free-flow conditions. *Atmos. Environ.* **45**, 1929–1939 (2011).

3. Lu, K., Meng, H., Liu, X., Zou, D. & Li, Q. Estimating Large-Scale Urban Traffic Emissions with Incomplete Covered Traffic Flow Data—A Case of Core Areas of Guangzhou, China. *Appl. Spat. Anal. Policy* **18**, 1–23 (2025).
